# Supplementary material
Source: PubMed Central journal article supplement (PMC7163699)
Supplement: EJI-47-563-s001.pdf [file EJI-47-563-s001.pdf]

# European Journal of Immunology

Supporting Information  
for

DOI 10.1002/eji.201646760

Jonatan Tuncel, Sabrina Haag and Rikard Holmdahl

**MHC class II alleles associated with Th1 rather than Th17 type immunity drive  
the onset of early arthritis in a rat model of rheumatoid arthritis**

## Supporting information

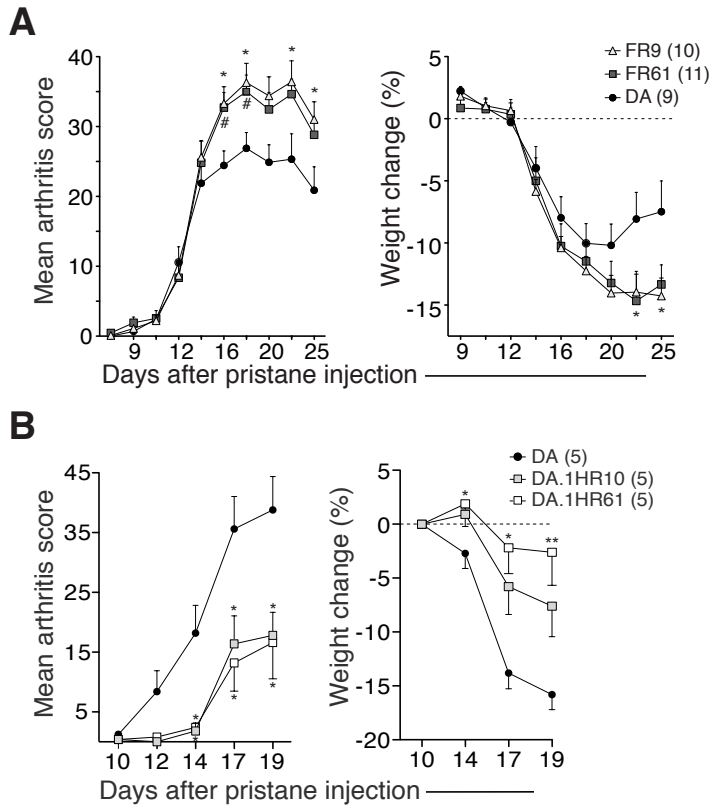

**FIGURE S1.** Evaluation of PIA in new MHCII congenic strains, DA.1FR61 and DA.1HR10. **(A)** The development of PIA in DA.1FR61 was compared to its parental congenic strain, DA.1FR9, and to DA. Arthritis clinical scores (left) and weight change (in % vs. day of disease onset, right) is shown; #, significant ( $P < 0.05$ ) DA vs. DA.1FR61; \*, significant ( $P < 0.05$ ) DA vs. DA.1FR9. **(B)** Arthritis clinical scores and weight change in pristane immunized DA.1HR10, DA.1HR61 and DA; \* $P < 0.05$ . All statistic comparisons in **(A)** and **(B)** were determined by Mann-Whitney;  $n = 5-11$  per group as indicated in figure.

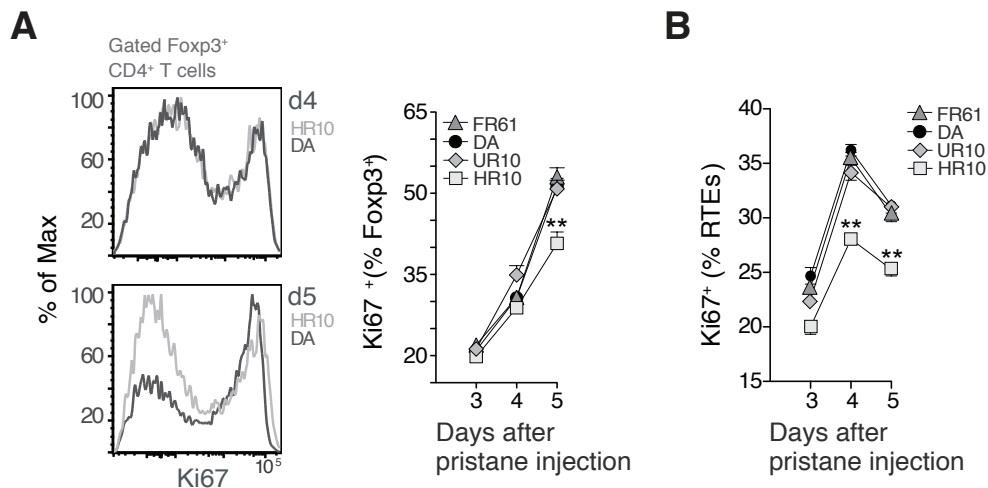

**FIGURE S2.** Proliferation of Foxp3<sup>+</sup> Tregs and recent thymic emigrants (RTEs) in dLNs after pristane administration. **(A)** Histograms show representative expression of Ki67 in CD4<sup>+</sup> Foxp3<sup>+</sup> Tregs from DA (blue) and DA.1HR10 at day 4 and 5 after pristane administration. Adjacent line chart shows summarized data from all strains. **(B)** Corresponding data (as shown in A) for RTEs (CD90<sup>+</sup> CD4<sup>+</sup> T cells) in pristane dLNs. **(A-B)** n = 5 per group; \*\* P<0.01 (by Mann-Whitney).

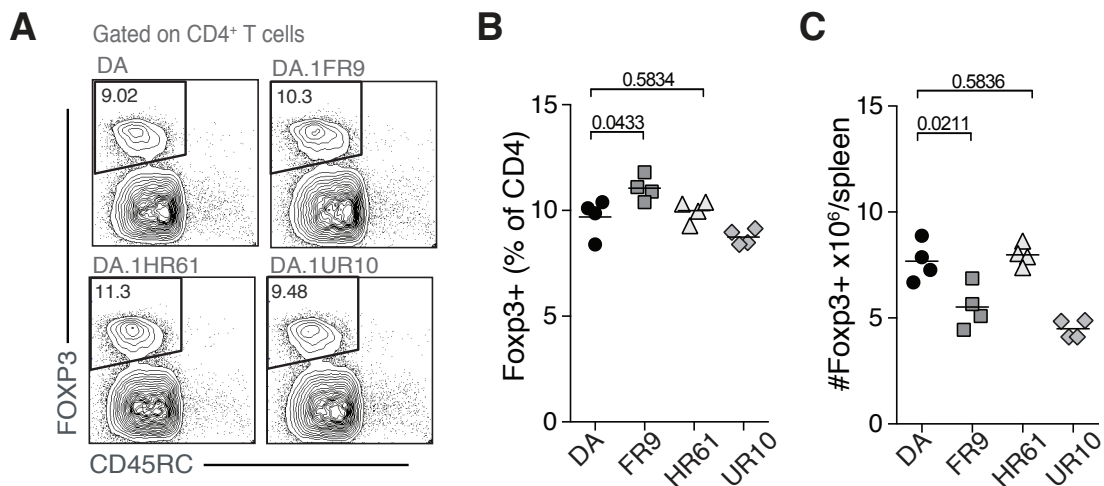

**FIGURE S3.** Variation in Foxp3<sup>+</sup> Tregs in naive MHCII-congenic rats does not correlate with disease susceptibility. **(A)** Representative counter plots of CD4 T cells in spleen of naive rats. Summarized data in **(B)** show frequencies of Tregs among CD4 T cells, and in **(C)** total number of Tregs per spleen. P-values depicted in graphs were determined by Mann-Whitney (n=4 per strain).

| Target               | Forward Primer (5')       | Reverse Primer (3')      |
|----------------------|---------------------------|--------------------------|
| <i>IFN-γ</i>         | ATTCATGAGCATCGCCAAGTTC    | TGACAGCTGGTGAATCACTCTGAT |
| <i>IL-17A</i>        | CTCAGACTACCTCAACCGTTCC    | GTGCCTCCCAGATCACAGAAG    |
| <i>IL-22</i>         | ATGCAGGAGGTGGTGCCTTTCC    | TCACCGCTGATGTGACAGGGG    |
| <i>IL-4</i>          | GCAACAAGGAACACCACGG       | AAGCACGGAGGTACATCACGT    |
| <i>IL-6</i>          | TAGTCCTTCTACCCCACTTCC     | TTGGTCCTTAGCCACTCCTTC    |
| <i>T-bet</i>         | CTGGAGCCCACTGGATGCGA      | GACTGCAGGACGATCATCTGGGTC |
| <i>GATA3</i>         | TTGCAACGCCTGCGGACTCT      | TCCTCGCTGCTGACAGCCTTC    |
| <i>STAT3</i>         | CAGGAGGGCAGTTTGAGTCGCT    | CGGGGAGGTAGCACACTCCG     |
| <i>IL-21</i>         | GGCTGCCTGCTAAGAGGACAGG    | CACAGGAAGGGCATTAGCCATGTG |
| <i>ROR-γt/Lingo4</i> | TAAGGGCTGAGGCACCCGCT      | CCAGTCCAAGGCAGTGGCTTCTC  |
| <i>TNFα</i>          | GACCCTCACACTCAGATCATCTTCT | TGCTACGACGTGGGCTACG      |
| <i>IL-2</i>          | CAAGCAGGCCACAGAATTGA      | CCGAGTTCATTTCCAGGCA      |
| <i>Beta Actin</i>    | GGGAAATCGTGCGTGACATT      | GCGGCAGTGGCCATCTC        |
| <i>GUSB</i>          | CAAGGCGTCAACAAGCAT        | CCTCCGAGTAGGGATAGTGG     |
| <i>Arbp</i>          | GCTTCATTGTGGGAGCAGACA     | CATGGTGTTCTTGCCCATCAG    |

**Table S1.** Primers for quantitative PCR.
